# Supplementary material for: Cognate peptide-receptor ligand mapping by directed phage display.
Source: Springer Nature journal article supplement (doi:10.1186/1477-5956-3-7), 2005-01-01
Supplement: Additional file 2 [file 1477-5956-3-7-s2.pdf]

| Encoded Peptide                          | pAb 07431 Selected Phage |
|------------------------------------------|--------------------------|
| GPDS <b>GFFSRLNWL</b> <b>YK</b> SGSTYPV  | Cognate HA X47 157-178   |
| GPDS <b>GFFSRLNWL</b> <b>TK</b> SGSTYPV  | HA X31 157-178 cDNA      |
| SCGPAREATLGATFAFECGS <b>GFFSRLNWLTKS</b> | TSS 399                  |
| SCGPAREATLGATFAFECGS <b>GFFSRLNWLTKS</b> | TSS 401                  |
| SCGPAREATLGATFAFECGS <b>GFFSRLNWLTKS</b> | TSS 402                  |
| SCGPAREATLGATFAFECGS <b>GFFSRLNWLTKS</b> | TSS 403                  |
| <b>GFFSRLNWLTKS</b> GST                  | TSS 400                  |
| GPGS <b>GFFSRLNWLTKS</b> SGSTYPVP        | TSS 404                  |
| GPGS <b>GFFSRLNWLTKS</b> SGSTYPVP        | TSS 405                  |
| GPGS <b>GFFSRLNWLTKS</b> SGSTYPVP        | TSS 406                  |
| GPGS <b>GFFSRLNWLTKS</b> SGSTYPVP        | TSS 407                  |
| GPGS <b>GFFSRLNWLTKS</b> SGSTYPVP        | TSS 408                  |
| GPGS <b>GFFSRLNWLTKS</b> SGSTYPVP        | TSS 409                  |
| PGS <b>GFFSRLNWLTKS</b> SGSTYPVP         | TSS 410                  |
| GPGS <b>GFFSRLNWLTKS</b> SGSTYPVP        | TSS 411                  |
| GPGS <b>GFFSRLNWLTKS</b> SGSTYPVP        | TSS 412                  |
| GPGS <b>GFFSRLNWLTKS</b> SGSTYPVP        | TSS 413                  |
